# Supplementary material for: Checkpoint Kinase 2 Inhibition Can Reverse Tamoxifen Resistance in ER-Positive Breast Cancer
Source: Int J Mol Sci. 2022 Oct 14;23(20):12290. doi: 10.3390/ijms232012290 (PMC9604393; doi:10.3390/ijms232012290)
Supplement: Supplementary file 1 [file ijms-23-12290-s001.zip › ijms-1930677-supplementary.pdf]

Figure S1

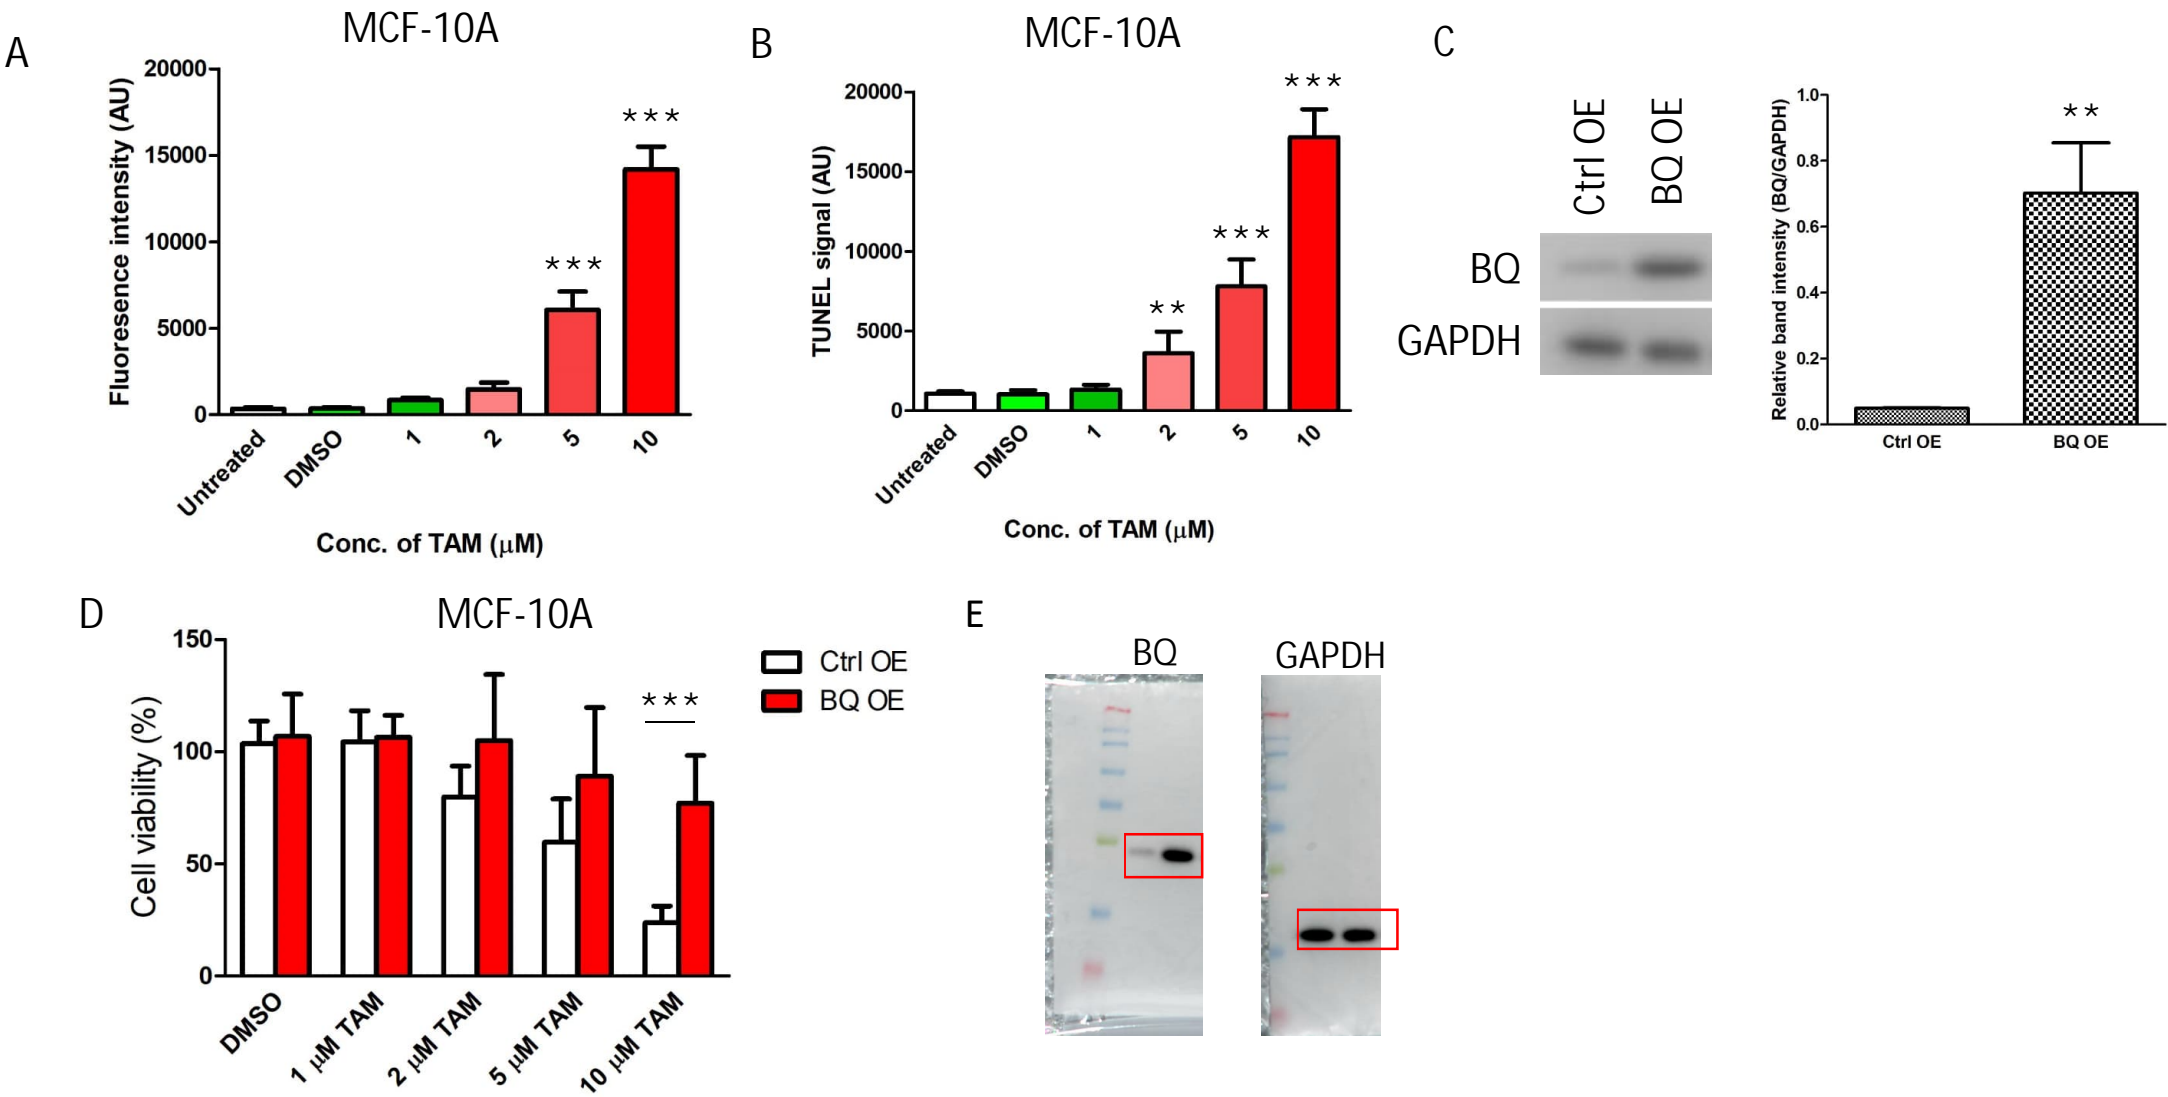

**Figure S1** Overexpression of BQ could compromise the effect of tamoxifen (TAM) in non-cancerous breast cell MCF-10A. A) The effect of TAM on ROS formation in MCF-10A. The cells were treated with different concentrations of TAM for 72 hours. ROS was determined by CM-H<sub>2</sub>DCFDA. The fluorescence signal represents ROS level. B) The effect of TAM on DNA damage. TUNEL was employed to detect DNA damage. The cells were treated with different concentrations of TAM for 72 hours. Results were shown as mean  $\pm$  SD from six independent experiments. One-way ANOVA with Bonferroni's post-test was used to compare the statistical significance with the untreated group. C) Overexpression of BQ in MCF-10A. The cells were transfected with pcDNA3.1-His-BQ323636.1. Proteins were harvested 48 hours post-transfection. Western blot with anti-BQ antibody was used to detect BQ expression. D) Overexpression of BQ could compromise the effect of TAM on MCF-10A. The cells were treated with TAM for 96 hours. MTT assay was used to determine cell viability. Results were shown as mean  $\pm$  SD from six independent experiments. Two-way ANOVA with Bonferroni's post-test was used to compare the statistical significance between the indicated groups. E) Representative raw blots in Figure S1C. \*\* and \*\*\* represent  $p < 0.01$  and  $p < 0.001$ , respectively.

Figure S2

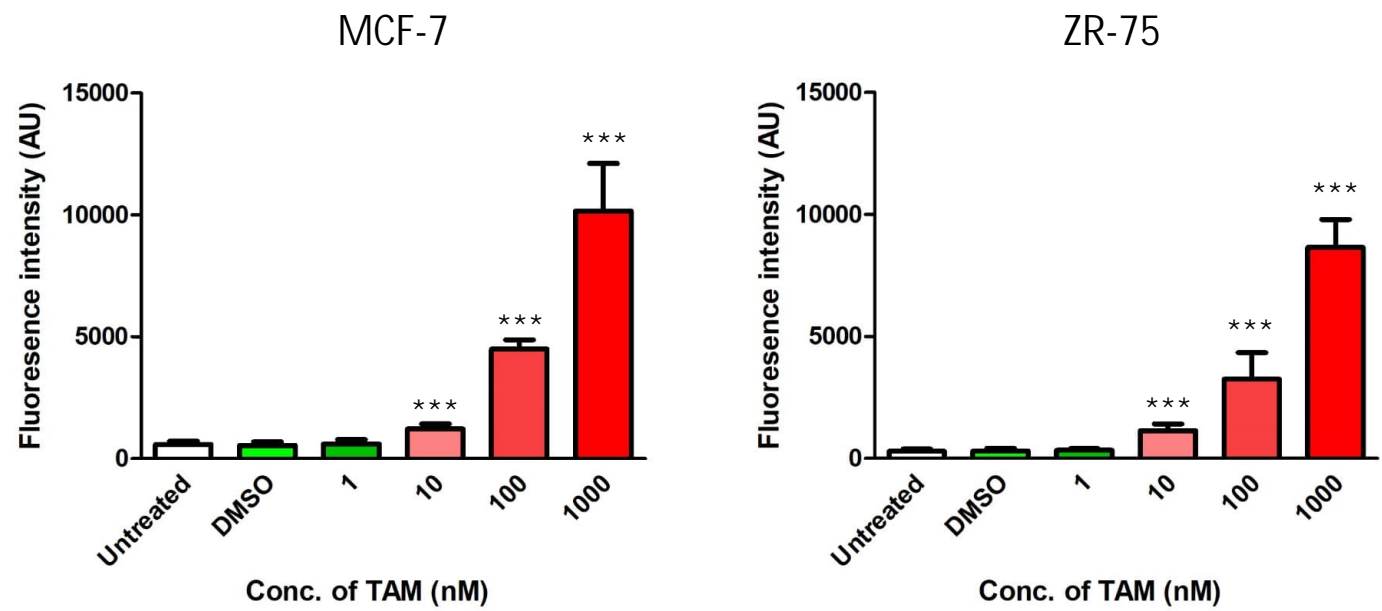

**Figure S2** The effect of TAM on ROS formation in MCF-7 and ZR-75. The cells were treated with TAM for 72 hours. ROS was determined by CM-H<sub>2</sub>DCFDA. The fluorescence signal represents ROS level. Results were shown as mean  $\pm$  SD from six independent experiments. One-way ANOVA with Bonferroni's post-test was employed to compare the statistical significance with untreated group. \*\*\* represents  $p < 0.001$ ,

Figure S3

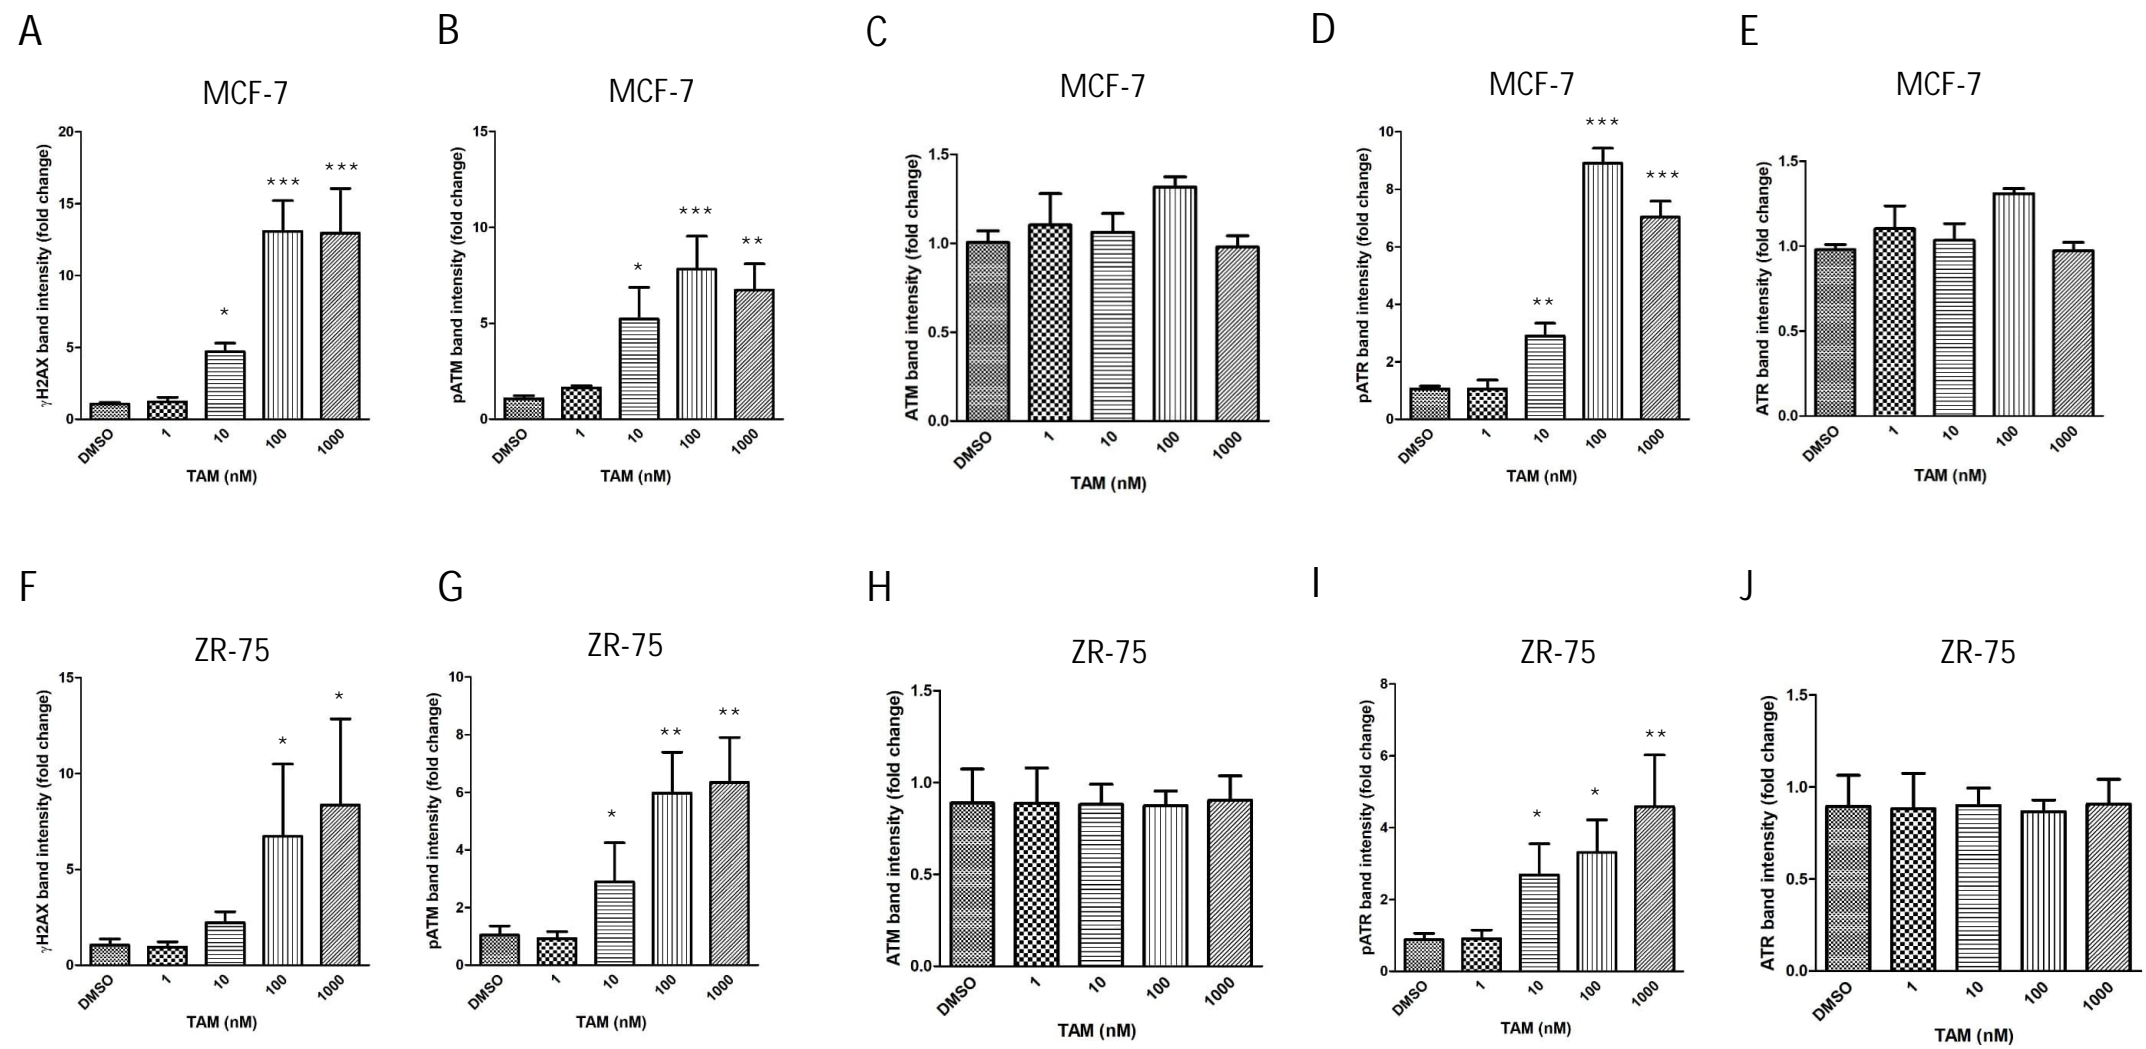

Figure S3

K

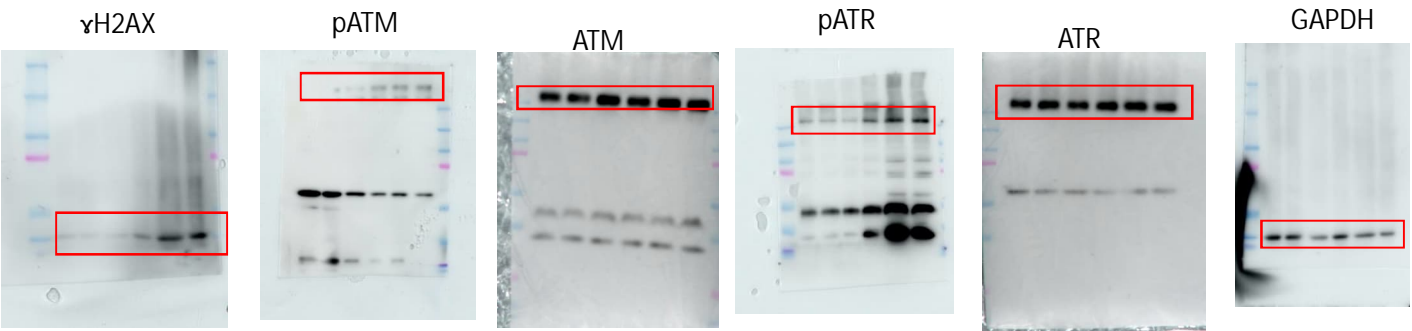

L

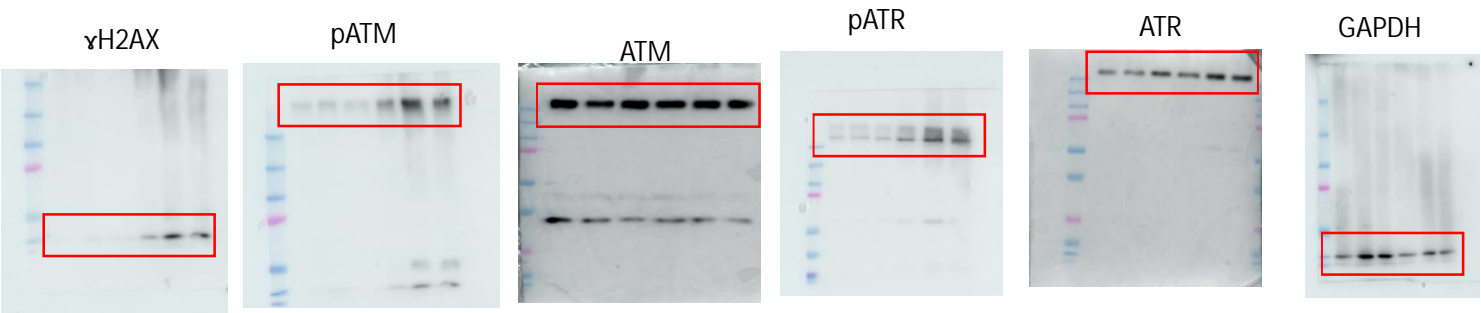

**Figure S3** Quantification of A)  $\gamma$ H2AX, B) p-ATM (Ser1981), C) ATM, D) p-ATR (Ser1989) and E) ATR band intensity of MCF-7 panel in Figure 1C. Quantification of F)  $\gamma$ H2AX, G) p-ATM, H) ATM, I) p-ATR and J) ATR band intensity of ZR-75 panel in Figure 1C. Fold change to untreated control was determined. Results were shown as mean  $\pm$  SD from three independent experiments. One-way ANOVA with Bonferroni's post-test was employed to compare the statistical significance with DMSO. \*, \*\*, and \*\*\* represent  $p < 0.05$ ,  $p < 0.01$ , and  $p < 0.001$ , respectively. K) Representative raw blots for the MCF-7 panel in Figure 1C. L) Representative raw blots for the ZR-75 panel in Figure 1C.

Figure S4

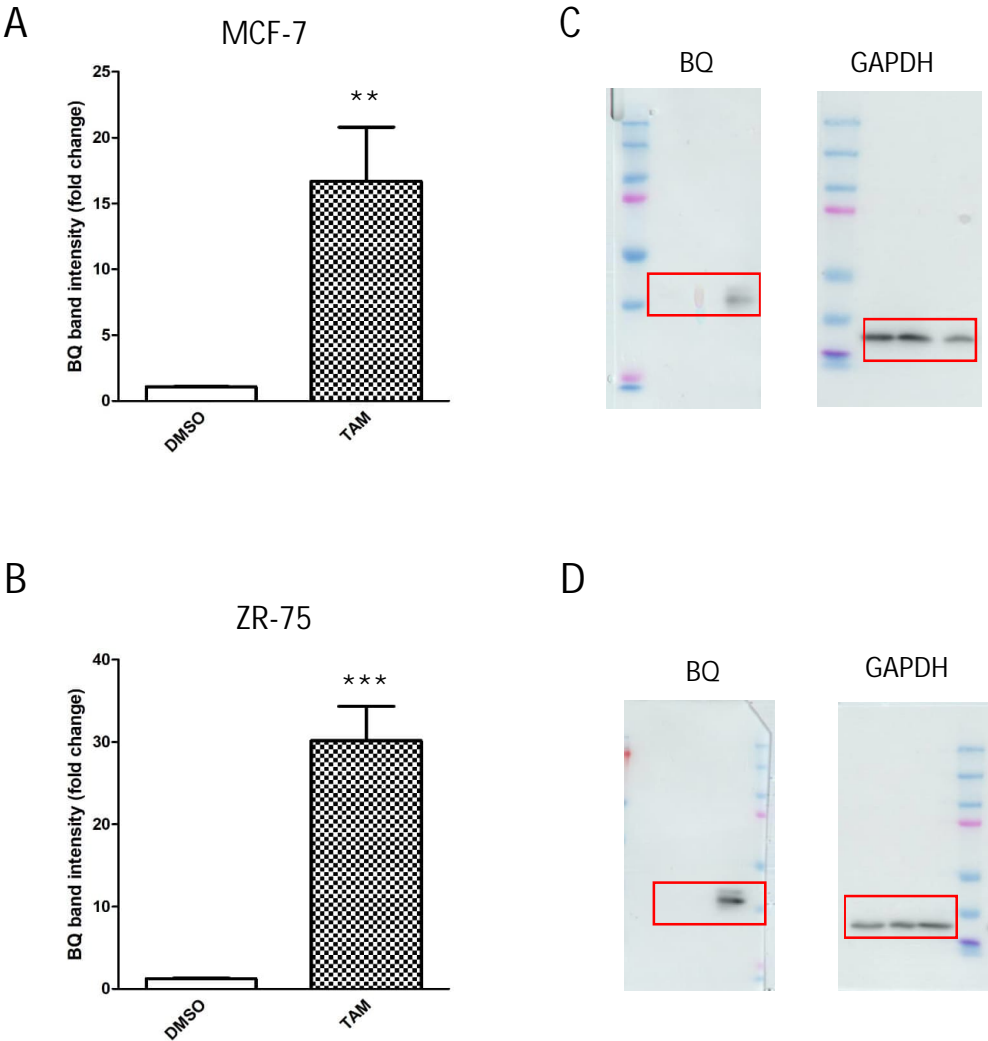

**Figure S4** Quantification of BQ in A) MCF-7 and B) ZR-75 panel in Figure 1D. Results were shown as mean  $\pm$  SD from three independent experiments. Students' t-test was employed to compare the statistical significance between groups. \*\* and \*\*\* represent  $p < 0.01$ , and  $p < 0.001$ , respectively. C) Representative raw blots for the MCF-7 panel in Figure 1D. D) Representative raw blots for the ZR-75 panel in Figure 1D.

Figure S5

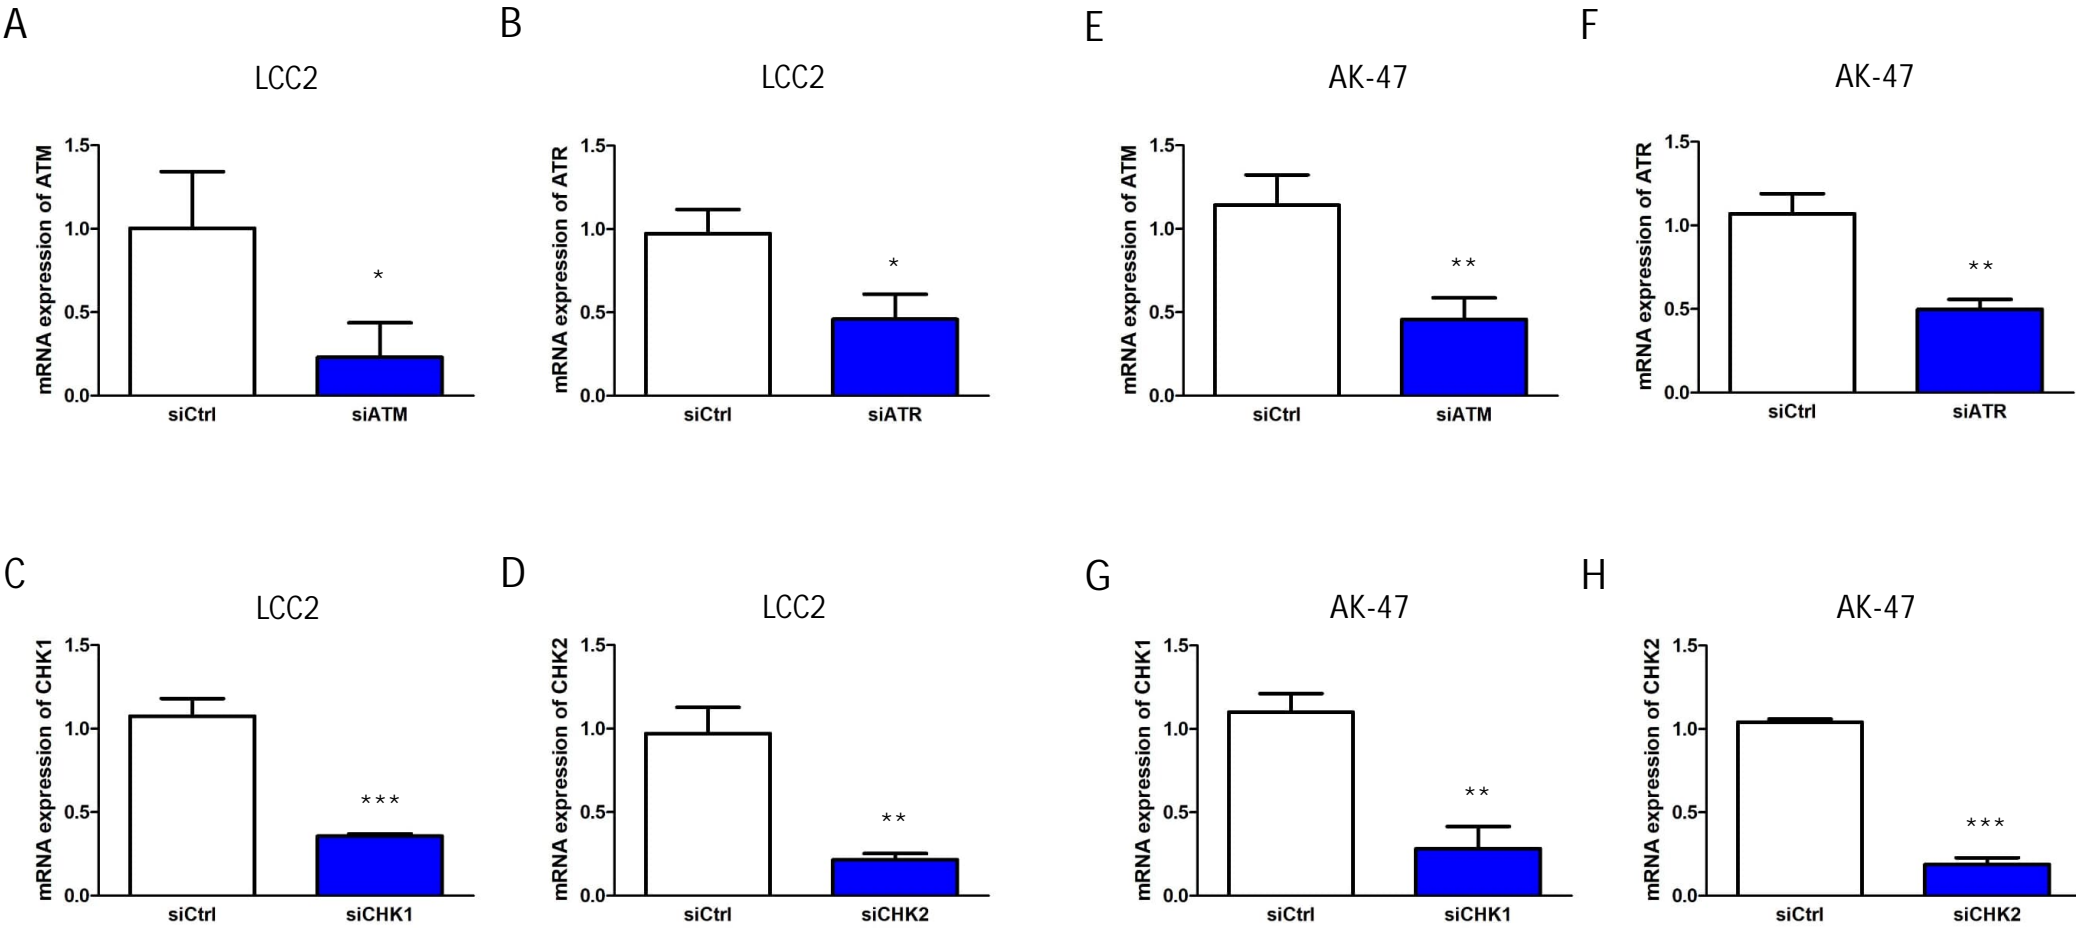

**Figure S5** Knockdown efficiency of A) siATM, B) siATR, C) siCHK1, and D) siCHK2 in LCC2. Knockdown efficiency of E) siATM, F) siATR, G) siCHK1, and H) siCHK2 in AK-47. The cells were transfected with 20 nM of the siRNA for 72 hours. qPCR was employed to determine the relative gene expression level. GAPDH was used as the internal control. Results were shown as mean  $\pm$  SD from three independent experiments. Students' t-test was employed to compare the statistical significance between groups. \*, \*\*, and \*\*\* represent  $p < 0.05$ ,  $p < 0.01$ , and  $p < 0.001$ , respectively.

Figure S6

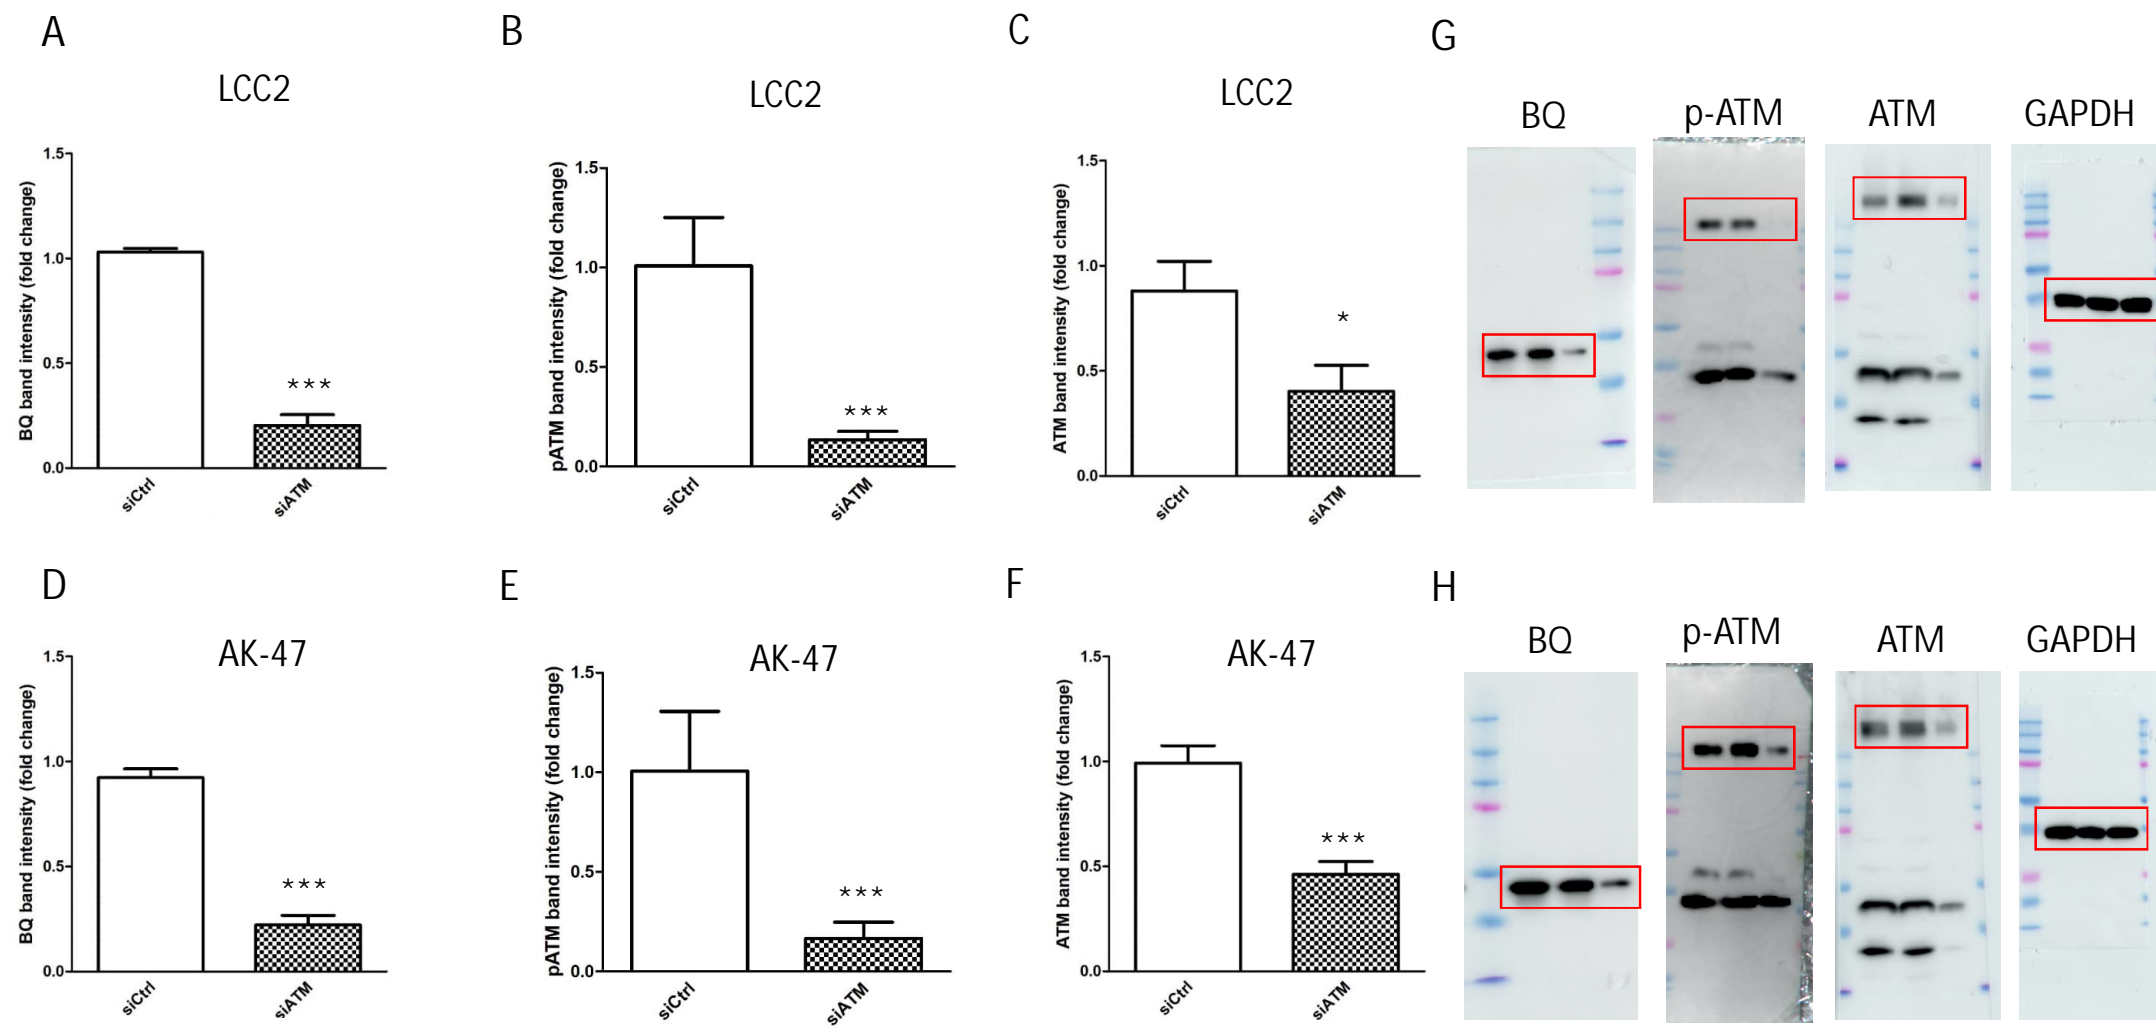

**Figure S6** Quantification of A) BQ, B) p-ATM (Ser1981) and C) ATM band intensity of the LCC2 panel in Figure 2A. Quantification of D) BQ, E) p-ATM (Ser1981) and F) ATM band intensity of the AK-47 panel in Figure 2A. G) Representative raw blots for the LCC2 panel in Figure 2A. H) Representative raw blots for the AK-47 panel in Figure 2A. Results were shown as mean  $\pm$  SD from three independent experiments. Students' t-test was employed to compare the statistical significance between groups. \* and \*\*\* represent  $p < 0.05$ , and  $p < 0.001$ , respectively.

Figure S7

A

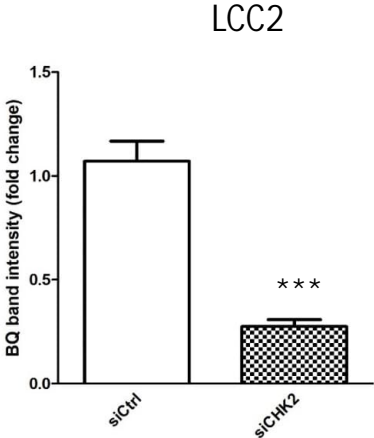

B

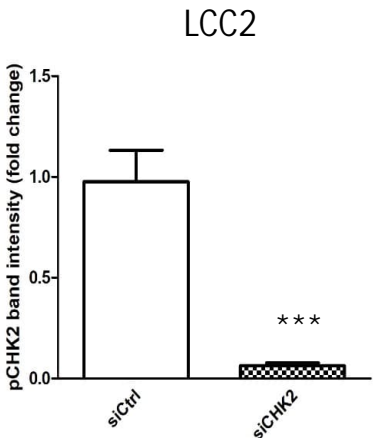

LCC2

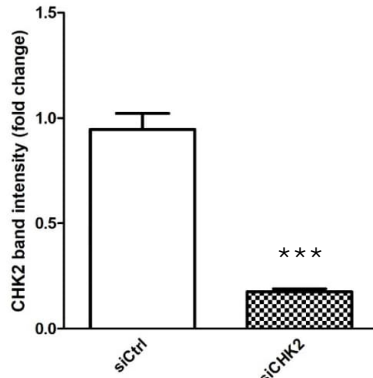

G

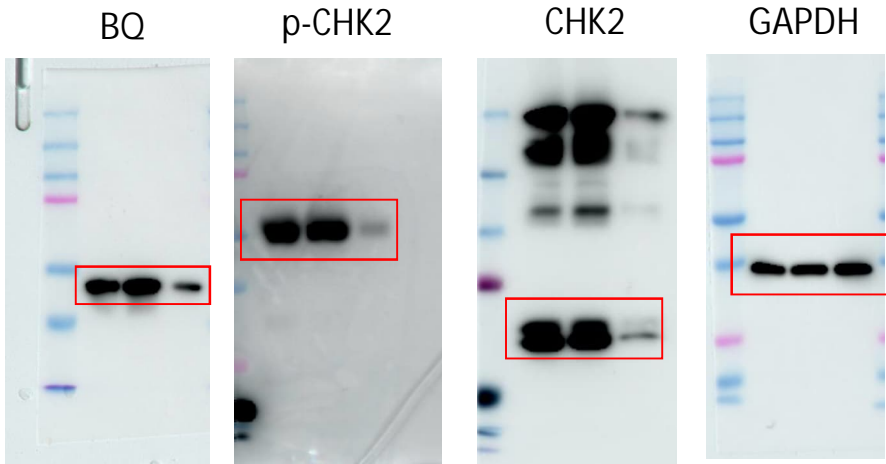

D

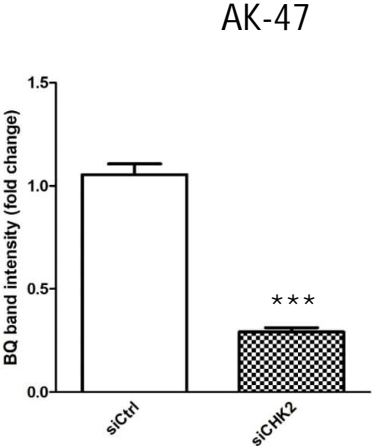

E

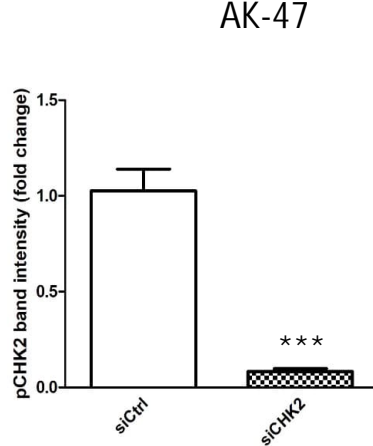

AK-47

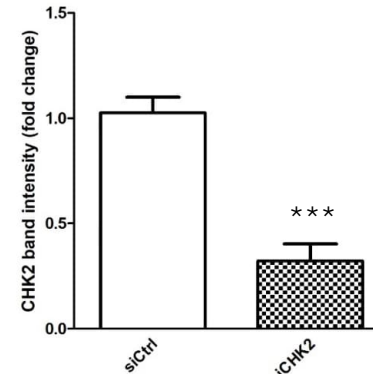

H

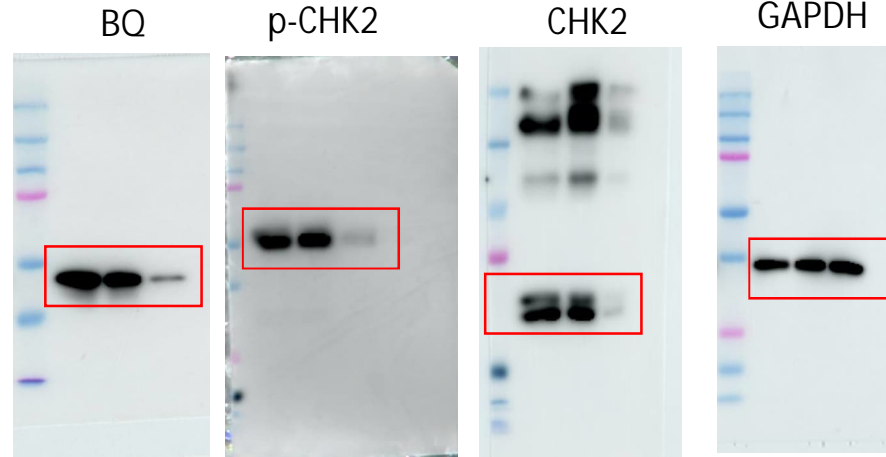

**Figure S7** Quantification of A) BQ, B) p-CHK2 (Thr68) and C) CHK2 band intensity of the LCC2 panel in Figure 2B. Quantification of D) BQ, E) p-CHK2 (Thr68) and F) CHK2 band intensity of the AK-47 panel in Figure 2B. G) Representative raw blots for the LCC2 panel in Figure 2B. H) Representative raw blots for the AK-47 panel in Figure 2B. Results were shown as mean  $\pm$  SD from three independent experiments. Students' t-test was employed to compare the statistical significance between groups. \*\*\* represents  $p < 0.001$ .

Figure S8

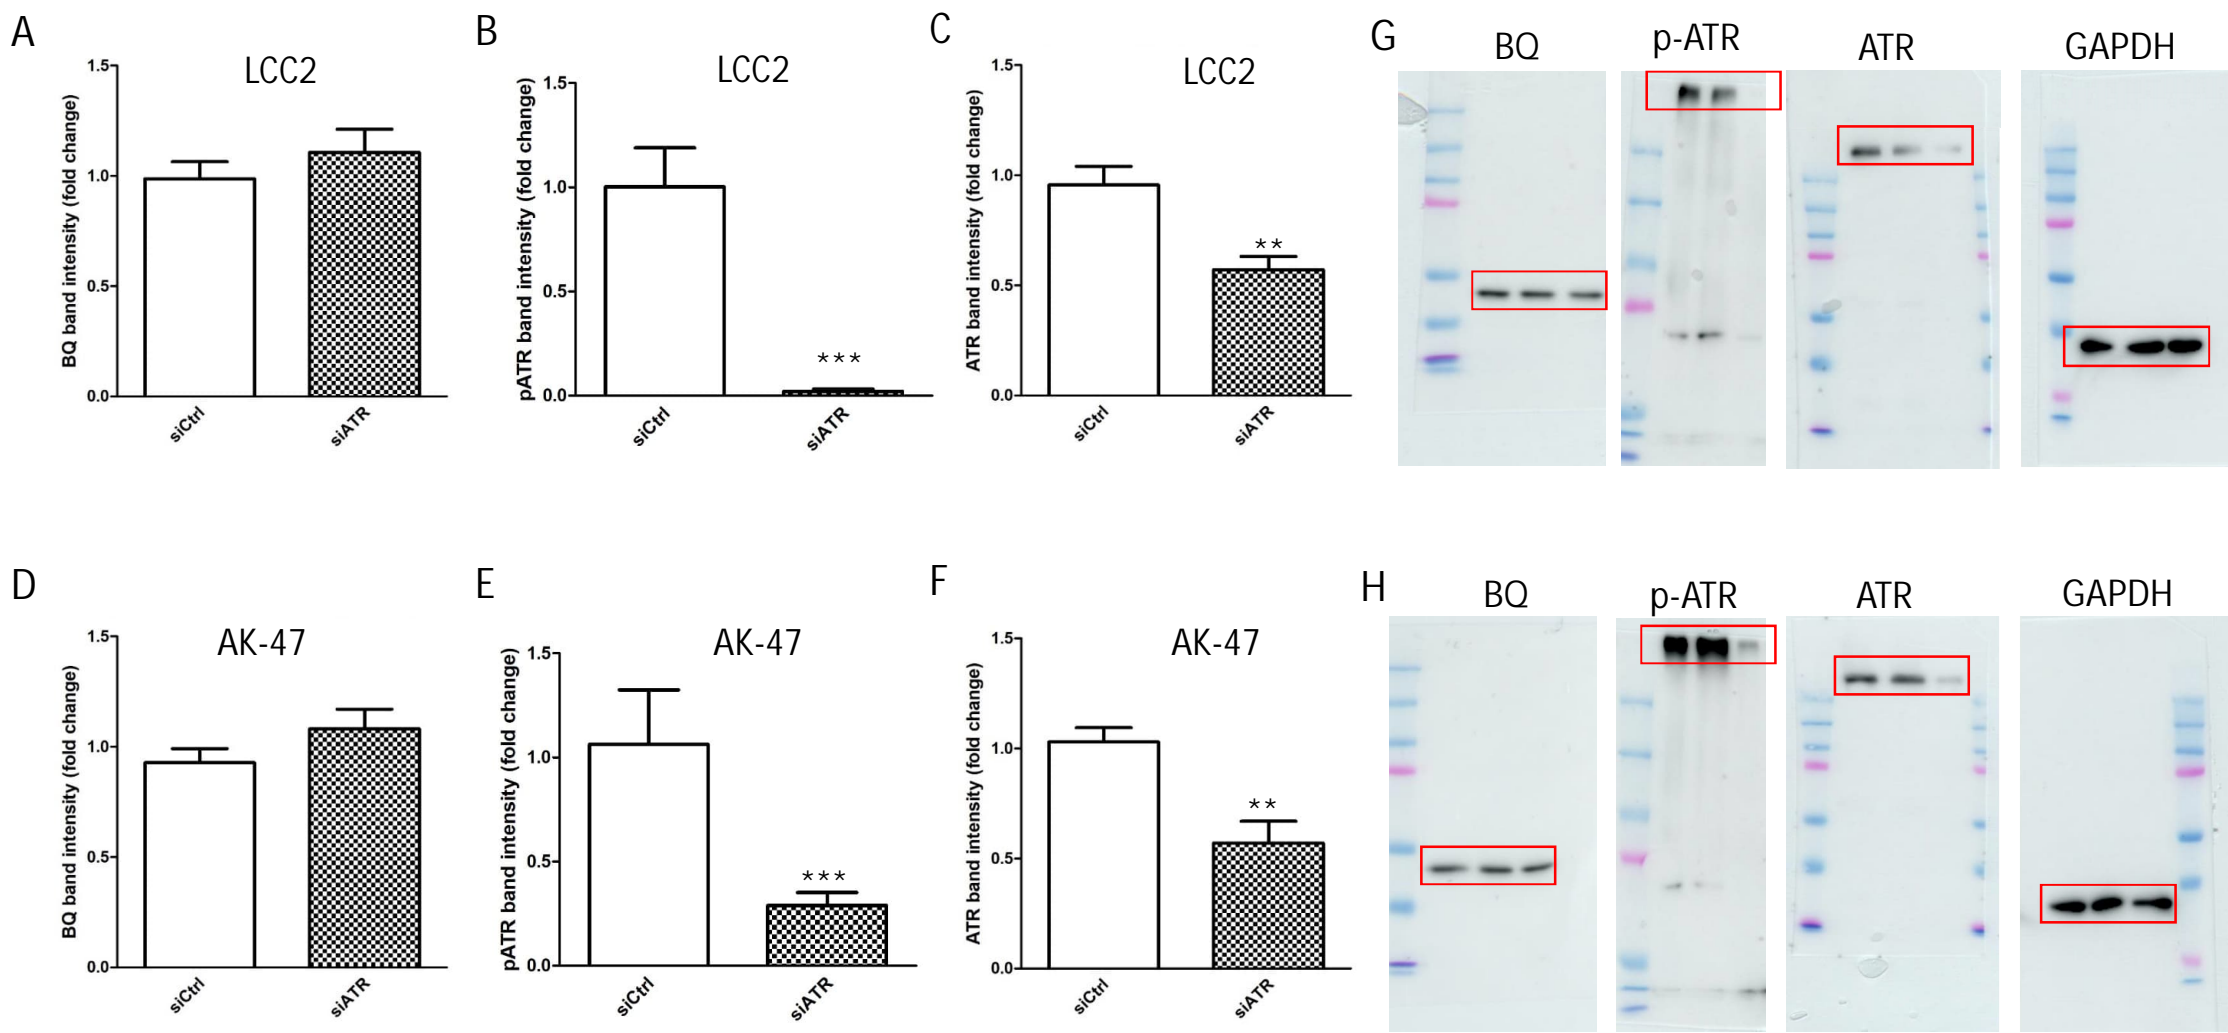

**Figure S8** Quantification of A) BQ, B) p-ATR (Ser1989) and C) ATR band intensity of the LCC2 panel in Figure 2C. Quantification of D) BQ, E) p-ATR (Ser1989) and F) ATR band intensity of the AK-47 panel in Figure 2C. G) Representative raw blots for the LCC2 panel in Figure 2C. H) Representative raw blots for the AK-47 panel in Figure 2C. Results were shown as mean  $\pm$  SD from three independent experiments. Students' *t*-test was employed to compare the statistical significance between groups. \*\* and \*\*\* represent  $p < 0.01$  and  $p < 0.001$ , respectively.

Figure S9

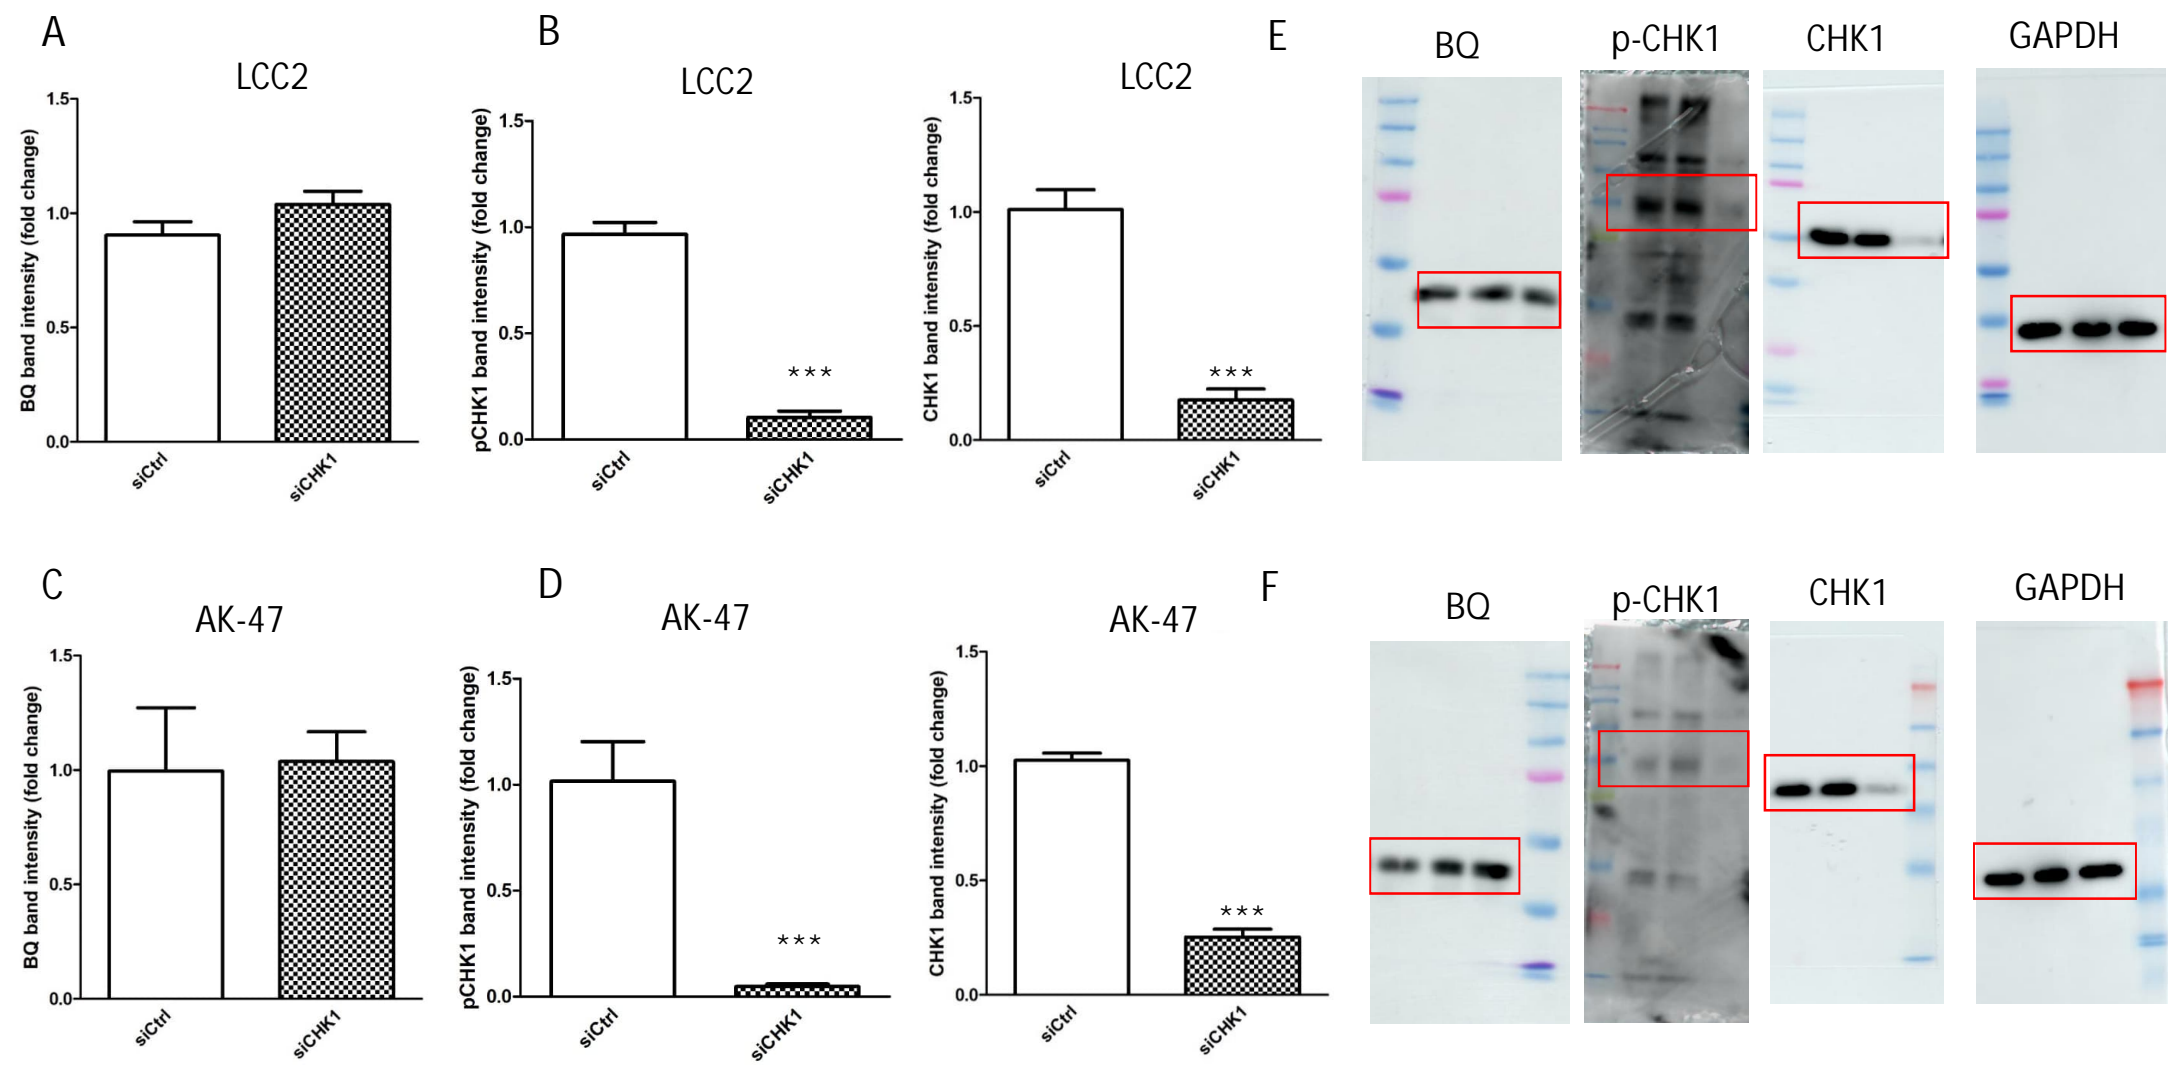

**Figure S9** Quantification of A) BQ, B) p-CHK1 (Ser345) and C) CHK1 band intensity of the LCC2 panel in Figure 2D. Quantification of D) BQ, E) p-CHK1 (Ser345) and F) CHK1 band intensity of the AK-47 panel in Figure 2D. G) Representative raw blots for the LCC2 panel in Figure 2D. H) Representative raw blots for the AK-47 panel in Figure 2D. Results were shown as mean  $\pm$  SD from three independent experiments. Students' t-test was employed to compare the statistical significance between groups. \*\*\* represents  $p < 0.001$ .

Figure S10

A

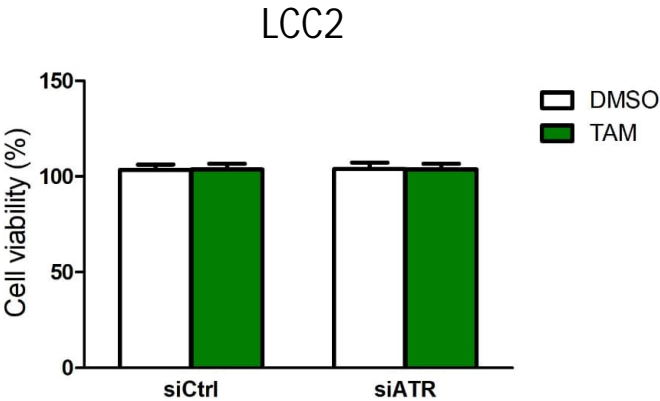

C

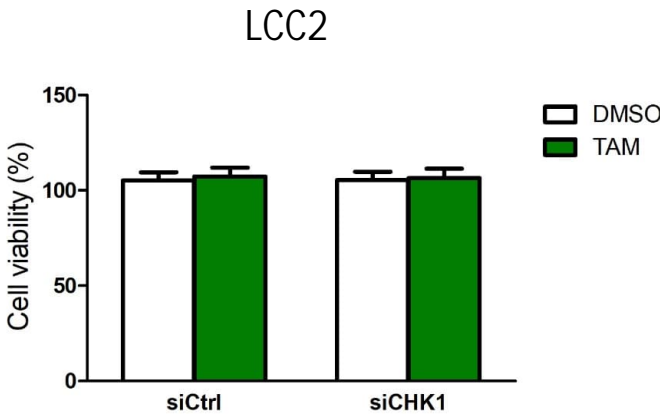

B

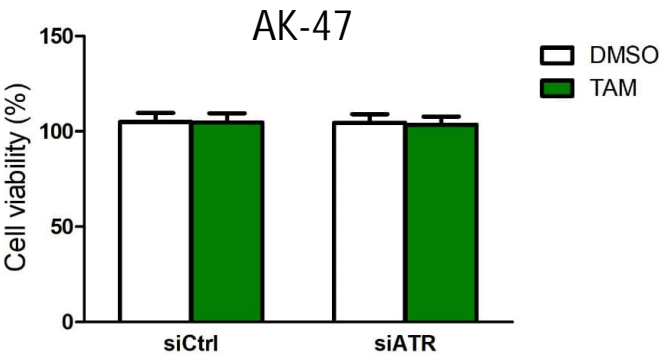

D

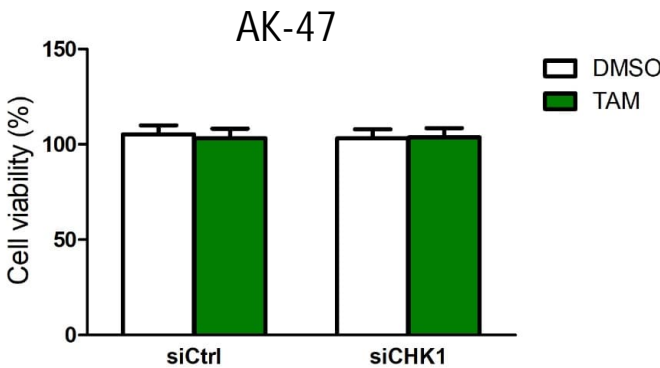

**Figure S10** The effect of ATR knockdown in A) LCC2 and B) AK-47 on TAM response. The effect of CHK1 knockdown in C) LCC2 and D) AK-47 on TAM response. The cells were treated 20 nM of the siRNA and 4  $\mu$ M of TAM for 96 hours. MTT assay was performed to determine cell viability. Results were shown as mean  $\pm$  SD from six independent experiments. Students' t-test was employed to compare the statistical significance between TAM and DMSO groups.

Figure S11

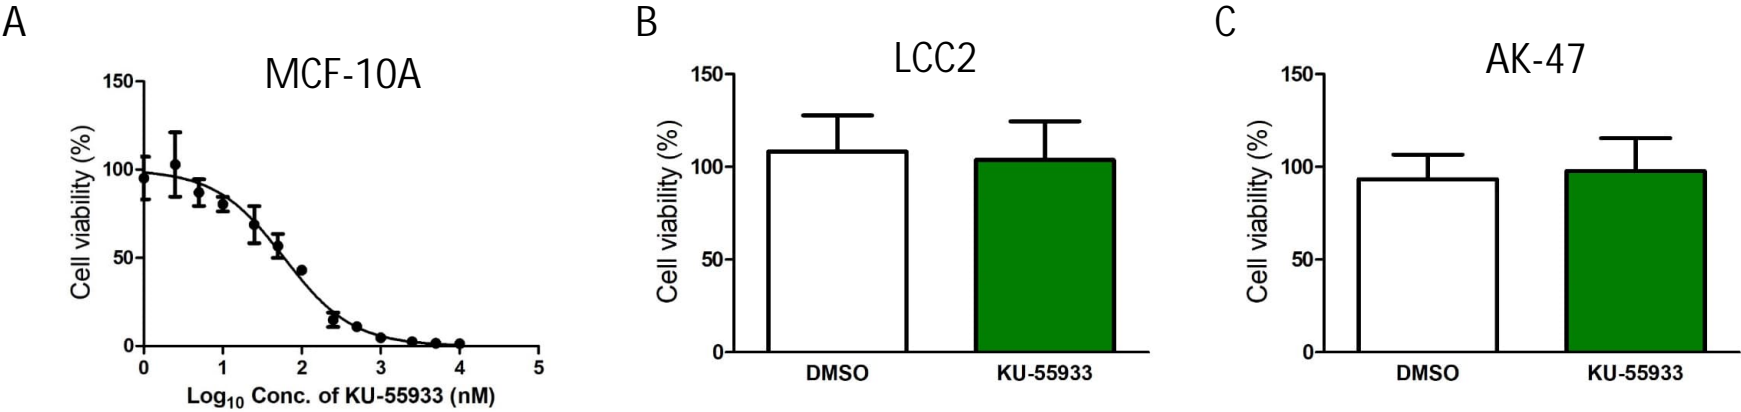

**Figure S11** The effect of KU-55933 on A) MCF-10A. MCF-10A cells were treated with different concentrations of KU-55933 for 96 hours. MTT assay was performed. Results were shown as mean  $\pm$  SD from four independent experiments. 5 nM was the maximum non-lethal dosage. The effect of KU-55933 on B) LCC2 and C) AK-47 on cell viability. The cells were treated with 5 nM of KU-55933 for 96 hours. MTT assay was performed. Results were shown as mean  $\pm$  SD from four independent experiments. Students' *t*-test was employed to compare the statistical significance between KU-55933 and DMSO groups.

Figure S12

A

CCT241533

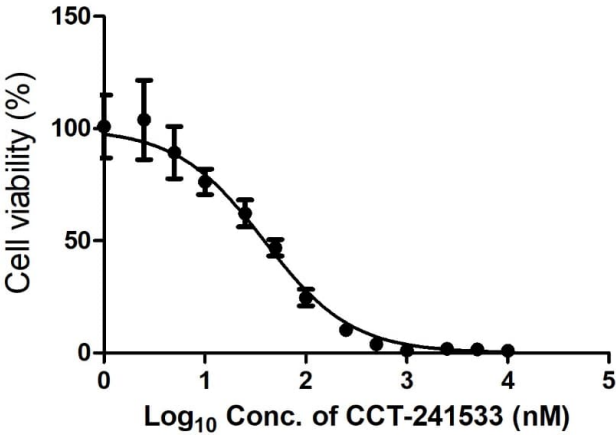

B

PV1019

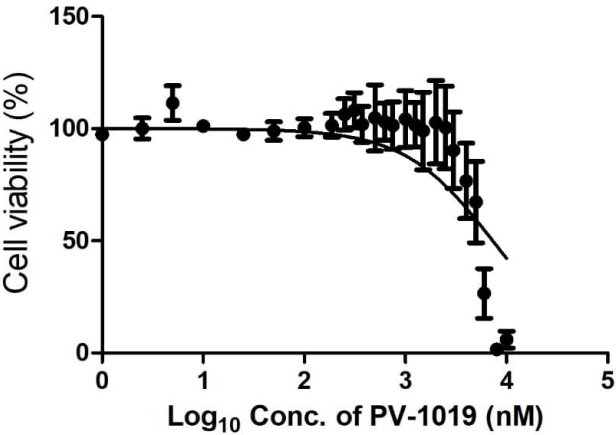

**Figure S12** The effect of A) CCT-241533 and B) PV1019 on the cell viability of MCF-10A. The cells were treated with different concentrations of CCT241533 and PV1019 for 96 hours. MTT assay was performed. Results were shown as mean  $\pm$  SD from four independent experiments. 10 nM of CCT241533 and 2  $\mu$ M of PV1019 were the maximum non-lethal dosage.

Figure S13

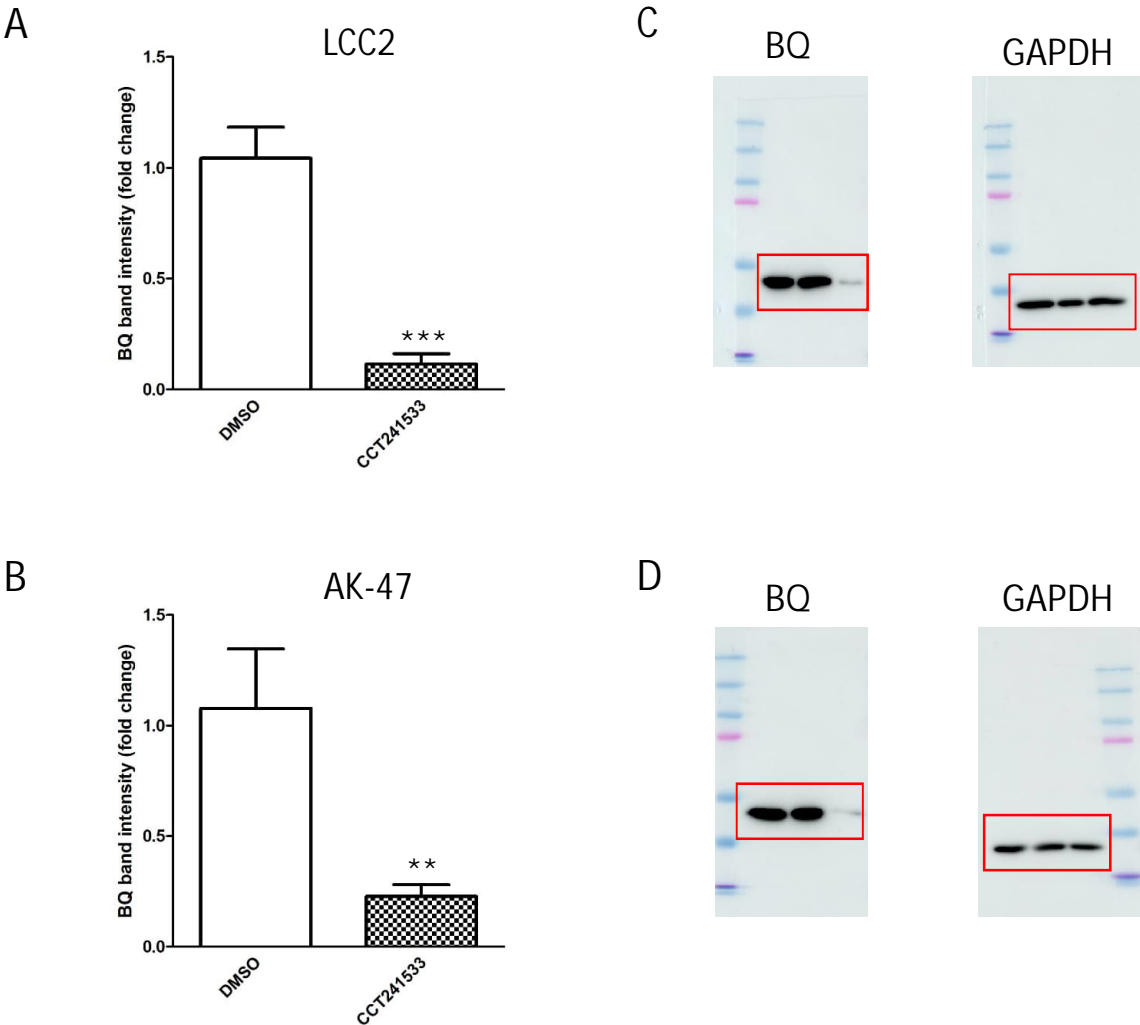

**Figure S13** Quantification of BQ band intensity in A) LCC2 and B) AK-47 panel in Figure 5C. C) Representative raw blots for the LCC2 panel in Figure 5C. D) Representative raw blots for the AK-47 panel in Figure 5C. Results were shown as mean  $\pm$  SD from three independent experiments. Results were shown as mean  $\pm$  SD from three independent experiments. Students' t-test was employed to compare the statistical significance between groups. \*\* and \*\*\* represent  $p < 0.01$  and  $p < 0.001$ , respectively.

Figure S14

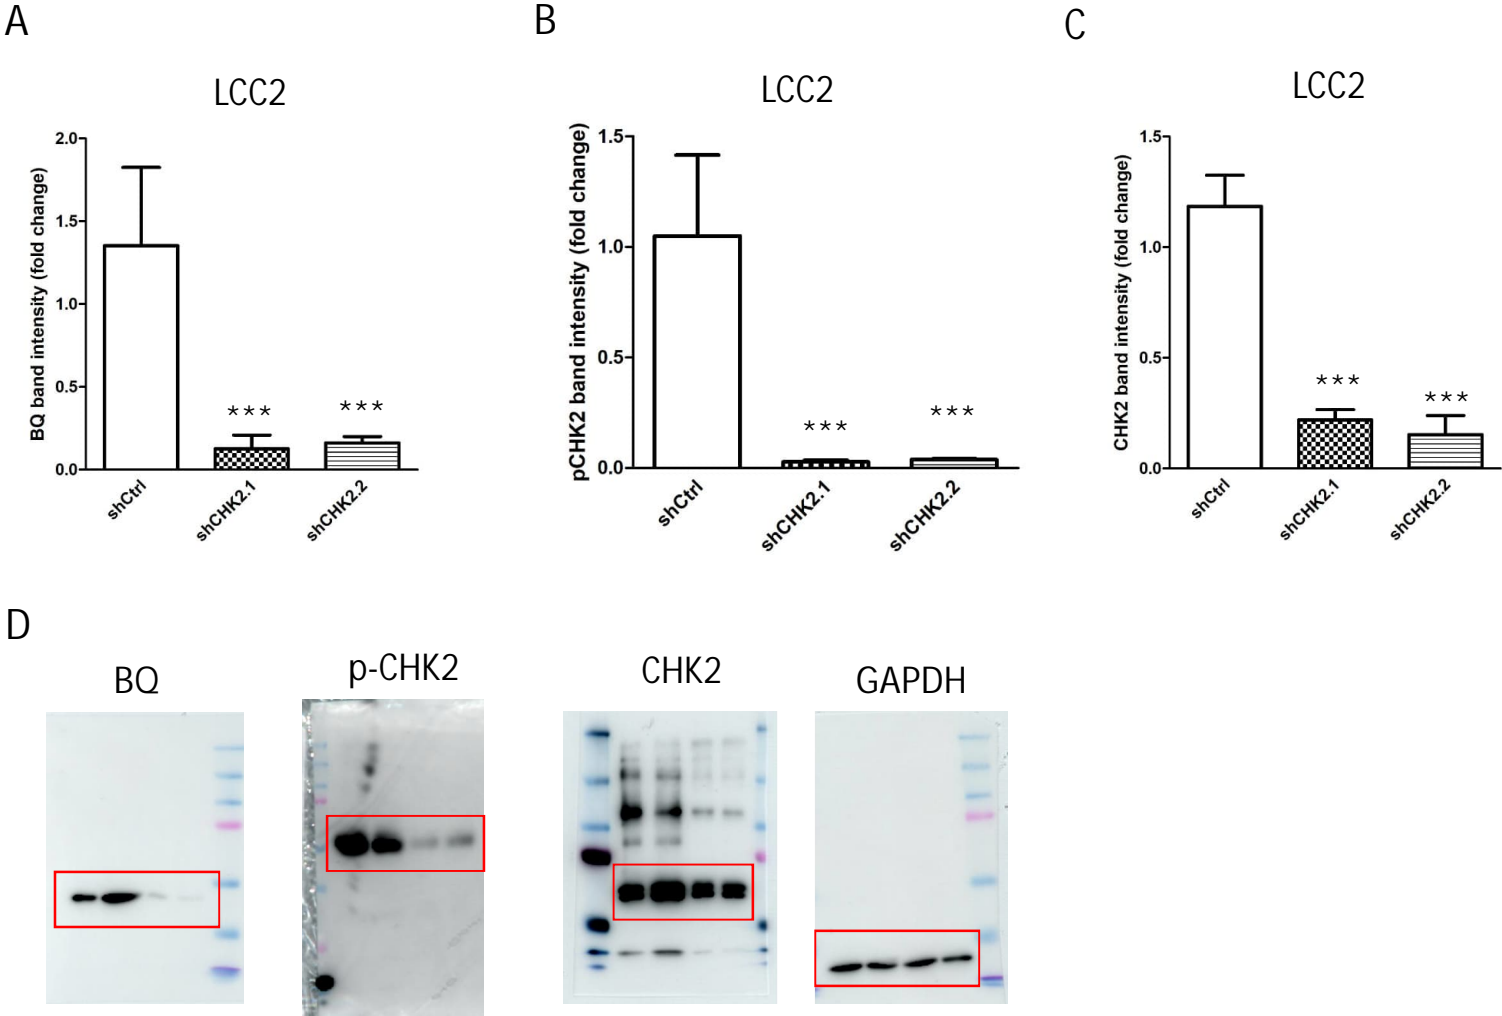

**Figure S14** Quantification of A) BQ B) p-CHK2 (Thr68) and C) CHK2 in Figure 5D. D) Representative raw blots for Figure 5D. Results were shown as mean  $\pm$  SD from three independent experiments. Results were shown as mean  $\pm$  SD from three independent experiments. One-way ANOVA with Bonferroni's post-test was employed to compare the statistical significance with shCtrl. \*\*\* represents  $p < 0.001$ .

Figure S15

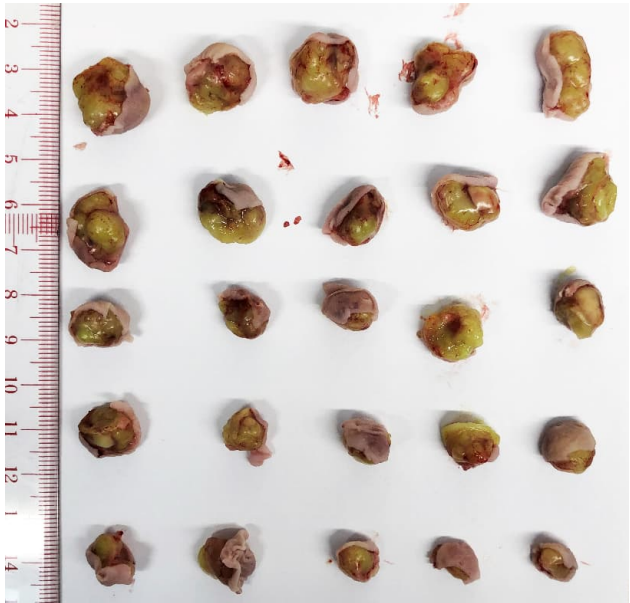

Saline

TAM

TAM + 1 mg/Kg CCT241533

TAM + 2.5 mg/Kg CCT241533

TAM + 5 mg/Kg CCT241533

**Figure S15** CCT241533 could reverse TAM resistance in vivo. The image shows the tumours at the time of harvest in Figure 5F.

Figure S16

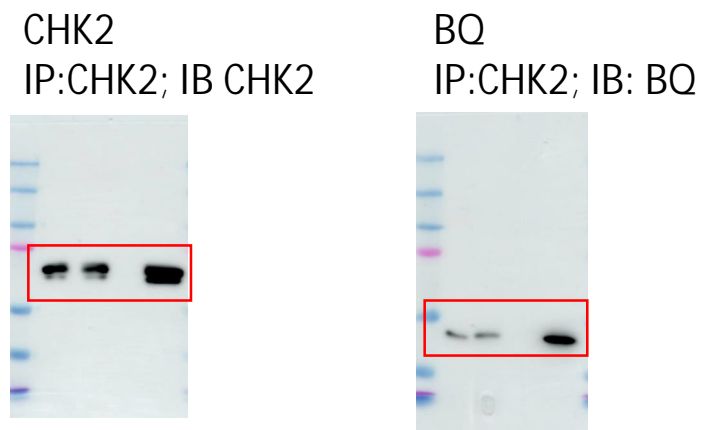

**Figure S16** Representative raw blots for Figure 6A.

Figure S17

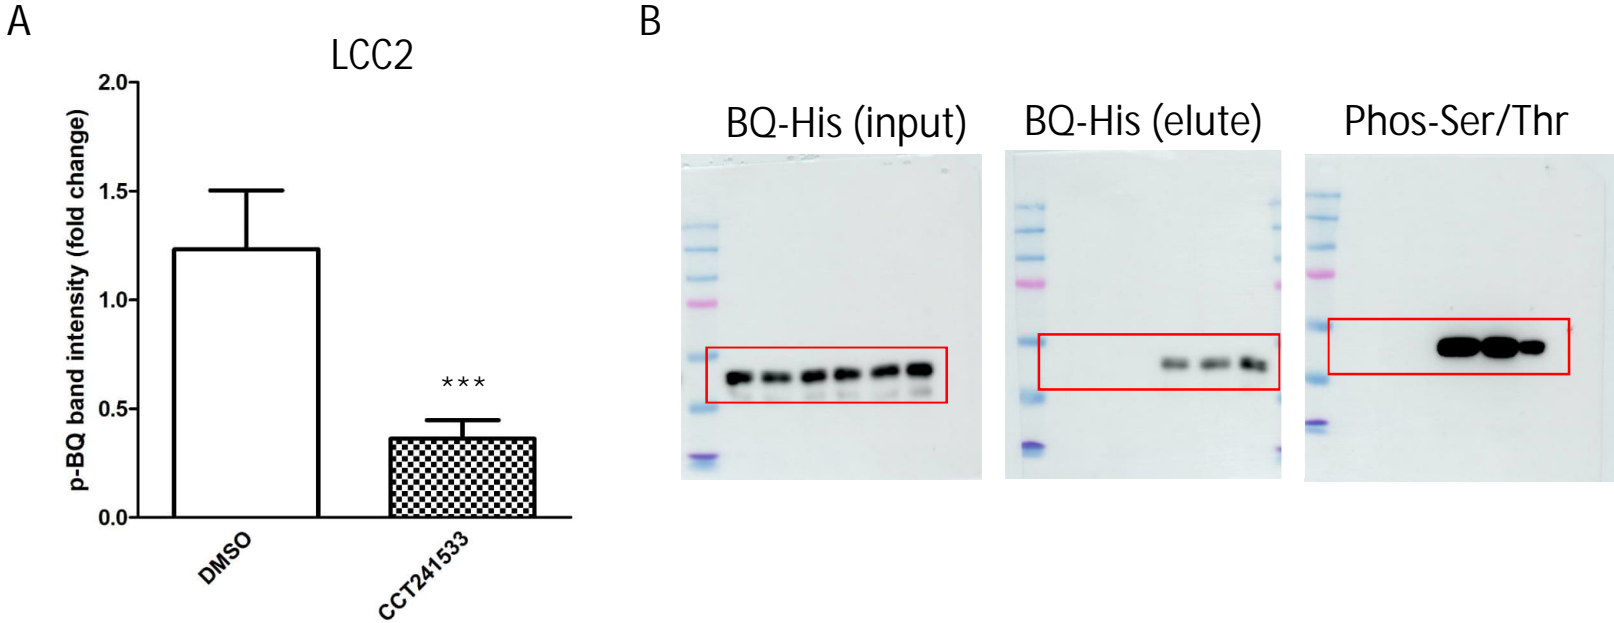

**Figure S17** A) Quantification of p-BQ in Figure 6B. B) Representative raw blots for Figure 6B. The signal in phos-Ser/Thr was relative to BQ elute. Fold change relative to untreated control was calculated. Results were shown as mean  $\pm$  SD from three independent experiments. Results were shown as mean  $\pm$  SD from three independent experiments. Students' t-test was employed to compare the statistical significance between groups. \*\*\* represents  $p < 0.001$ .

Figure S18

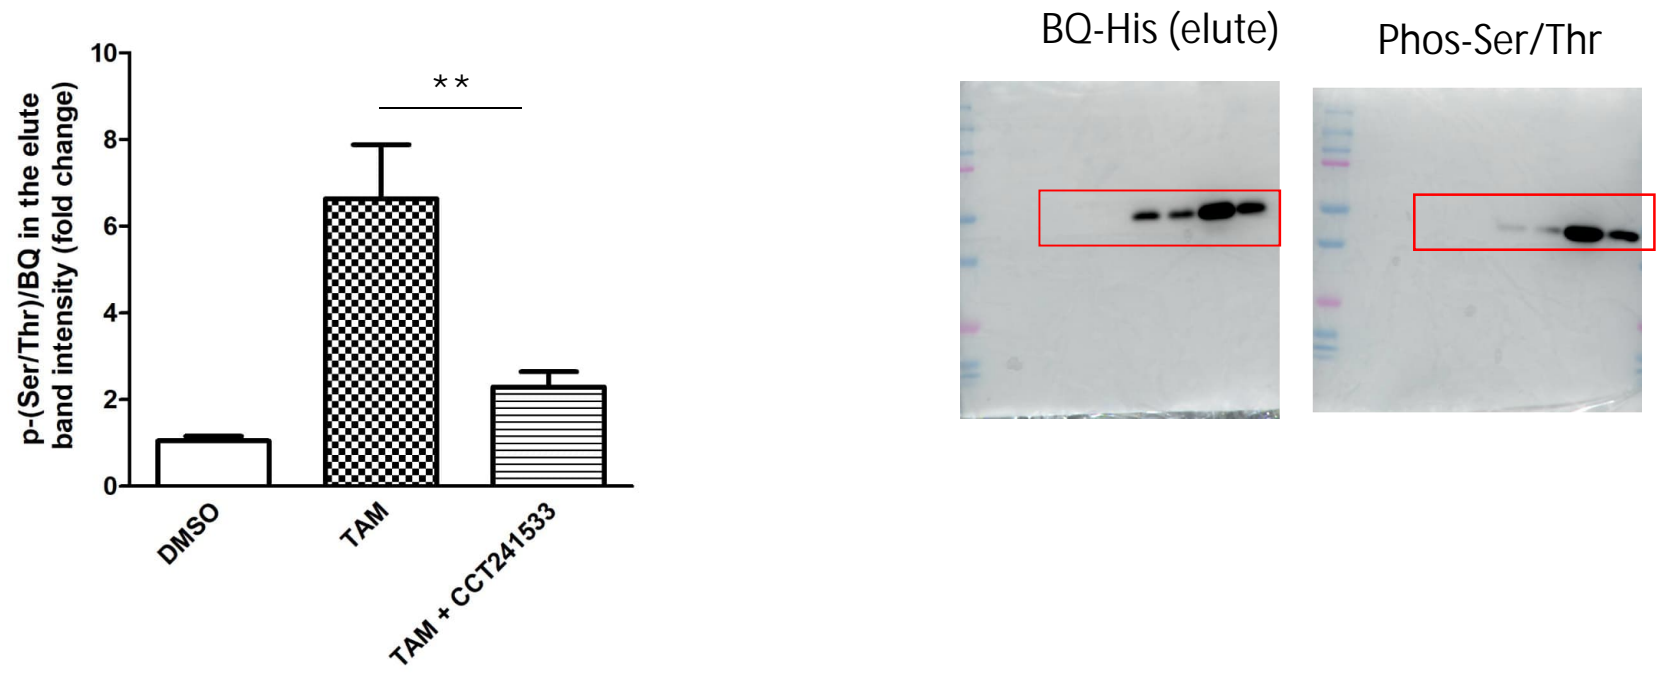

**Figure S18** Quantification of p-BQ in Figure 6C. The signal in phos-Ser/Thr was relative to BQ elute. Fold change relative to untreated control was calculated. Results were shown as mean  $\pm$  SD from three independent experiments. Results were shown as mean  $\pm$  SD from three independent experiments. One-way ANOVA with Bonferroni's post-test was employed to compare the statistical significance between indicated groups. \*\* represents  $p < 0.01$ .

Figure S19

A

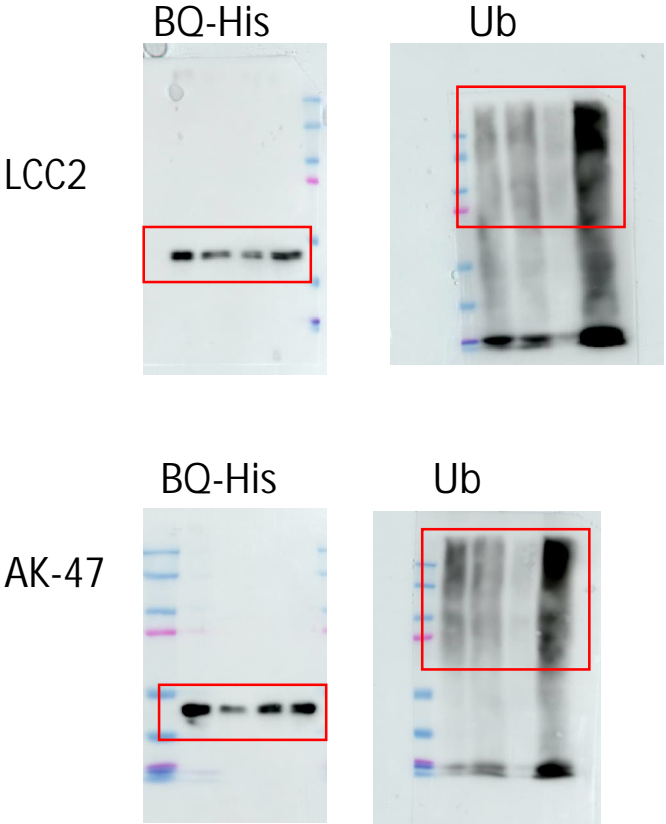

B

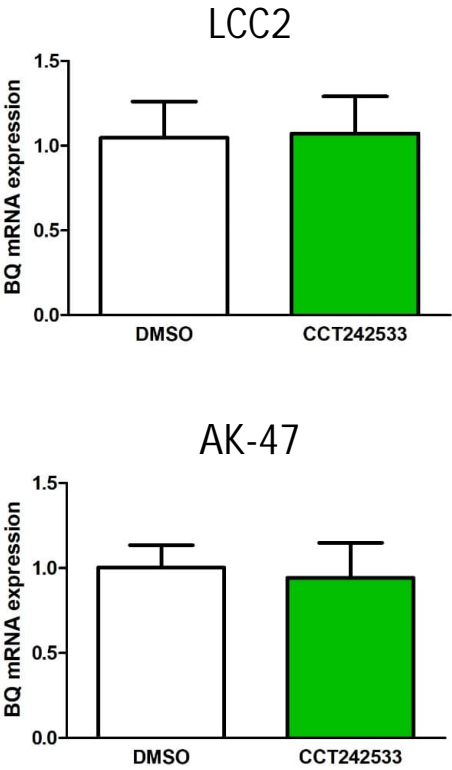

**Figure S19** A) Representative raw blots for Figure 6D. B) The effect of CCT241533 on mRNA level of BQ in LCC2 and AK47 cells. qPCR was employed. Results were shown as mean  $\pm$  SD from six independent experiments. Students' *t*-test was employed to compare the statistical significance between groups. There was no statistical significance between DMSO and CCT241533 groups.
